# Supplementary material for: Electron doping in non-magnetic YH3 leads to room temperature ferromagnetism and a flat band: insights from density functional theory
Source: Royal Society of Chemistry journal article supplement (doi:10.1039/d4cp03859b), 2025-01-01
Supplement: d4cp03859b1.pdf [file d4cp03859b1.pdf]

***The effect of Electron doping in non magnetic  $YH_3$  Leading to Room Temperature Ferromagnetism and Flat Band: Insights from Density functional theory***

Pratap Mane<sup>1</sup>, Ravi Kumar Trivedi<sup>2,3</sup>, Parthasarathy Velusamy<sup>4</sup>, Brahmananda Chakraborty<sup>\*5, 6</sup>

<sup>1</sup>Seismology Division, Bhabha Atomic Research Centre, Trombay, Mumbai 400085, India

<sup>2</sup>Department of Physics, Karpagam Academy of Higher Education, Coimbatore 641021, Tamil Nadu, India,

<sup>3</sup>Centre for Computational Physics, Karpagam Academy of Higher Education, Coimbatore 641021, Tamil Nadu, India

<sup>4</sup>Department of Computer Science and Engineering, Karpagam Academy of Higher Education, Coimbatore 641021, India

<sup>5</sup>High Pressure and Synchrotron Radiation Physics Division, Bhabha Atomic Research Centre, Trombay, Mumbai, India

<sup>6</sup>Homi Bhabha National Institute

Email: [brahma@barc.gov.in](mailto:brahma@barc.gov.in)

**Supplementary information:-**

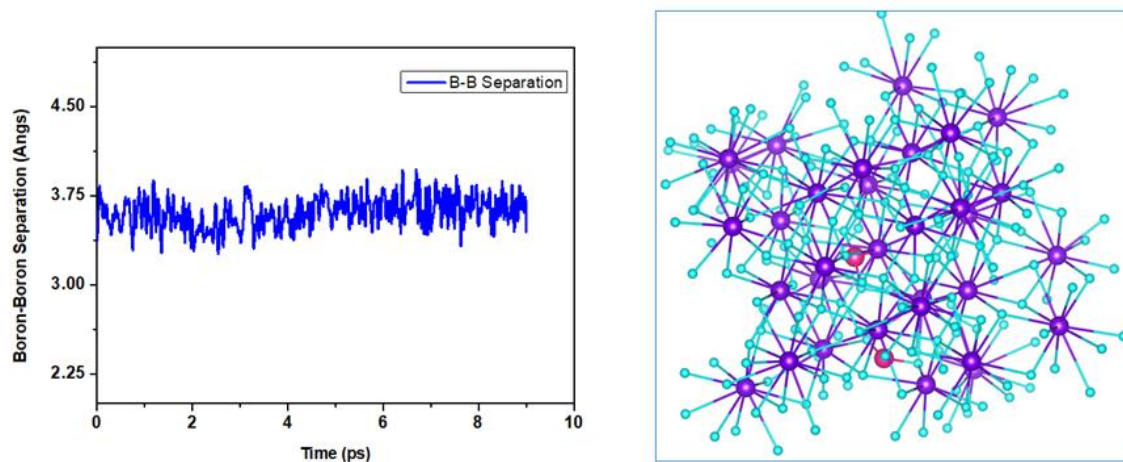

**Figure-S1 Fluctuations in B-B separation Structural snap shot at 300 K, and 3.57Å separation, after 10 ps with 2 Boron atoms substitution as obtained from AIMD simulations**

With the increasing B-B separation, the total energy may not change monotonically as there may be different magnetic interactions at different separation, e.g, superexchange interactions, Zener double exchange interactions, RKKY interaction etc. Different mechanisms valid at different regime. If we see  $\Delta E$ , the energy difference between AFM and FM state it is maximum of 0.27 eV (of the order of 0.1 eV as mentioned by the reviewer), which is the magnetic interaction energy but the total energy difference between different B-B configuration is around 7-8 eV, which comes due to interactions between electrons and ions. The large energy difference between different B-B configurations implies that if we start with particular B-B separations, it is unlikely to get another B-B separation.

This justifies that chances of B-B clustering is less as energy of starting B-B configuration differs from other B-B configuration. We have done AIMD simulations at 300 K and found that fluctuations in B-B separation are very less even after 10 ps.

So there is less chance of B-B clustering as B atoms are substituted in place of H atom and bonded in the environment by Y atom and other H atoms. Different B-B separation corresponds to different impurity concentration. The idea of studying different B-B separation is to find the configuration for which the energy difference between AFM and FM state is maximum. Experimentalist can choose the impurity concentration corresponding to that B-B separation to maximize  $\Delta E$  as well as Curie temperature. But once a particular B-B separation is chosen, B-B atoms are unlikely to get clustered due to higher energy barriers as well as the fact that B atoms are not ad atoms, but bonded on the site with Y and other H atoms.

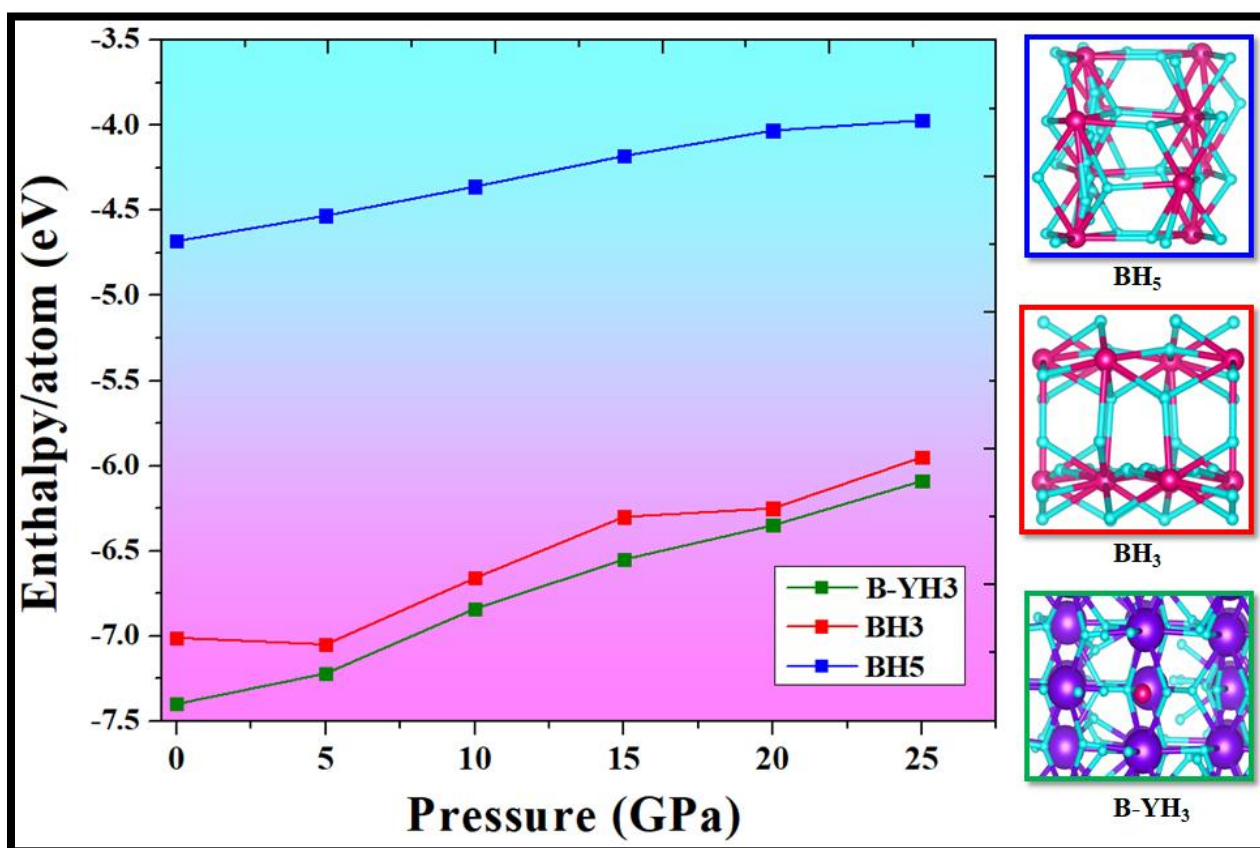

Figure S-2: DFT calculated enthalpy as a function of pressure for the DFT-GGA calculations between the pressure range 0–25GPa for BH<sub>3</sub>, BH<sub>5</sub>, and B-YH<sub>3</sub>
